# Supplementary material for: The lexicon of antimicrobial peptides: a complete set of arginine and tryptophan sequences
Source: PubMed Central journal article supplement (PMC8140080; doi:10.1038/s42003-021-02137-7), 2021-05-21
Supplement: 42003_2021_2137_MOESM2_ESM.pdf [file 42003_2021_2137_MOESM2_ESM.pdf]

Supplementary Information for

**The Lexicon of Antimicrobial Peptides: a Complete Set of Arginine and  
Tryptophan Sequences.**

**Authors:** Sam Clark, Thomas A Jowitt, Lynda K Harris, Christopher G Knight and Curtis B  
Dobson.

**Supplementary Figures 1-5**

**Supplementary Tables 1 and 2**

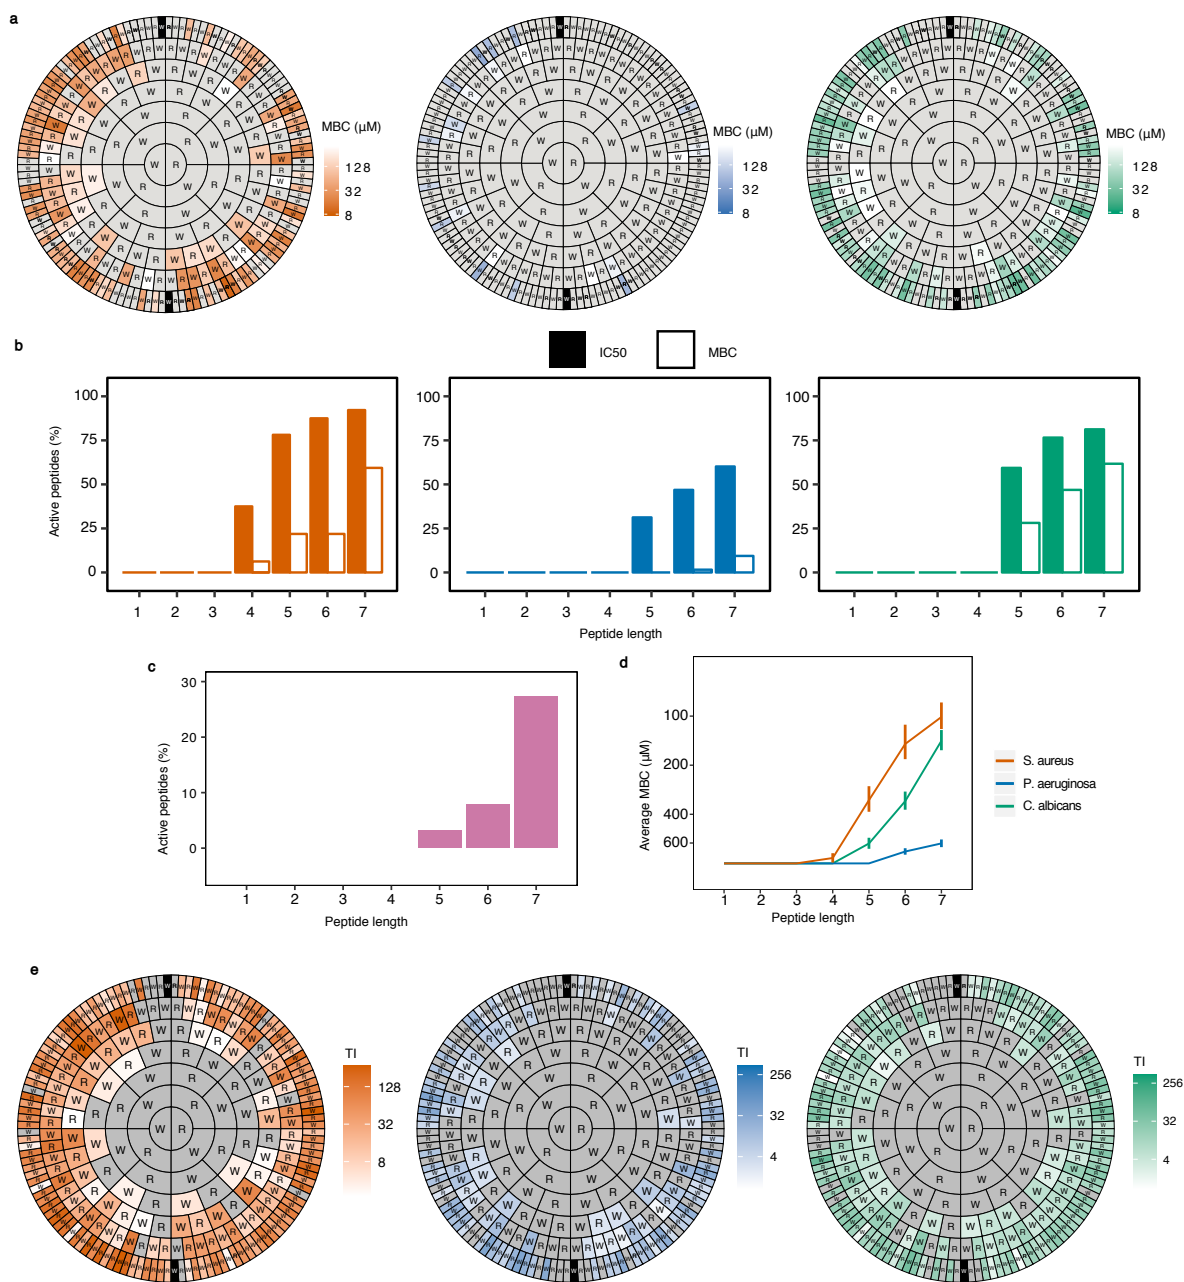

**Supplementary Fig. 1: Microbicidal activity of the complete set of peptides comprised of W and R up to 7 residues long.** (a) Microbicidal activities against the 3 different microorganisms studied (*S. aureus*, *P. aeruginosa* and *C. albicans*), represented using Harris-Clark diagrams. Grey sections represent peptides which did not exhibit an MBC within the range of concentrations assayed (0.8 – 400  $\mu\text{M}$ ). (b) Comparison of the percentage of peptides in each length subset which exhibited inhibitory or microbiocidal activity against the 3 different microorganisms within the concentration range assayed. (c) The percentage of peptides in each length subset that exhibited hemolytic activity within the concentration range assayed. (d)

Effect of peptide length on harmonic means and standard deviations of MBC. For further explanation see Fig. 1. All error bars shown are  $\pm$  s.d. ( $n = 2, 4, 8, 16, 32, 64$  and  $128$  peptides for lengths  $1 - 7$  respectively). (e) Therapeutic indices against the three microorganisms represented using Harris-Clark diagrams. Grey sections represent peptides which exhibited neither an  $IC_{50}$  nor an  $EC_{50}$  within the range of concentrations assayed ( $0.8 - 400 \mu\text{M}$ ).

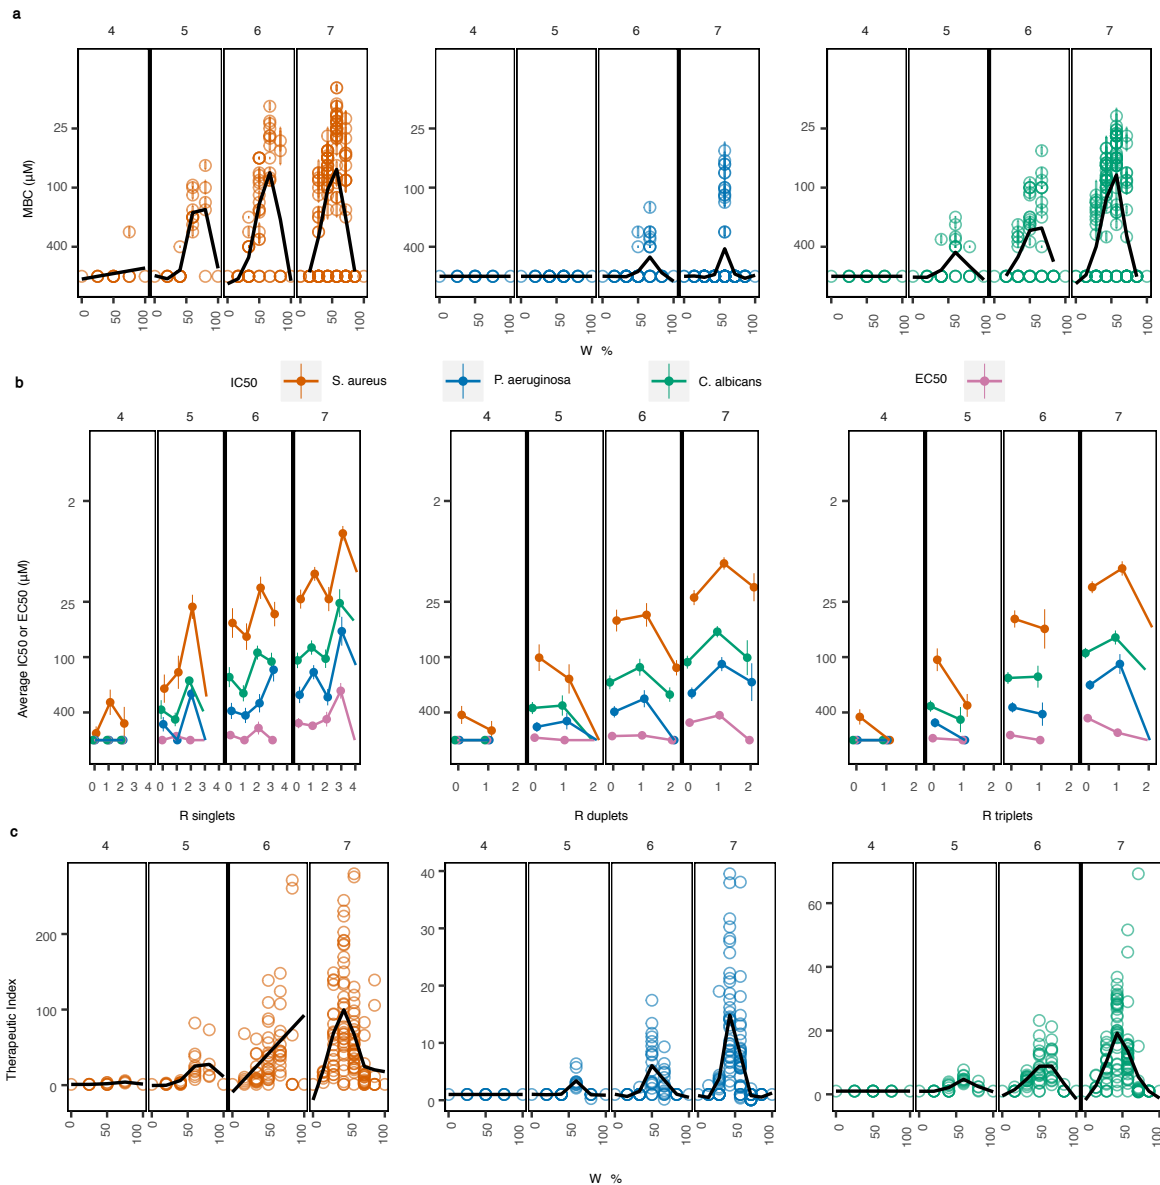

**Supplementary Fig. 2: Effect of various peptide primary structural features on microbicidal activity.** (a) Microbicidal activity plotted against percentage W residues within the sequence, faceted by peptide length (indicated at the top of each sub panel). The black spline through the data indicates the average activity for each peptide length. Error bars shown are  $\pm$  s.e.m. (b) Analysis of average inhibitory and hemolytic activities for peptides with

different numbers of isolated R singlets (R), duplets (RR), and triplets (RRR), faceted by peptide length (indicated at the top of each sub panel). Error bars shown are +/- s.e.m. For further explanation see Fig. 2. (c) Therapeutic index plotted against percentage W residues within the sequence, faceted by peptide length (indicated at the top of each sub panel). The black spline through the data indicates the average therapeutic index for each peptide length. Error bars shown are +/- s.e.m. (n=4).

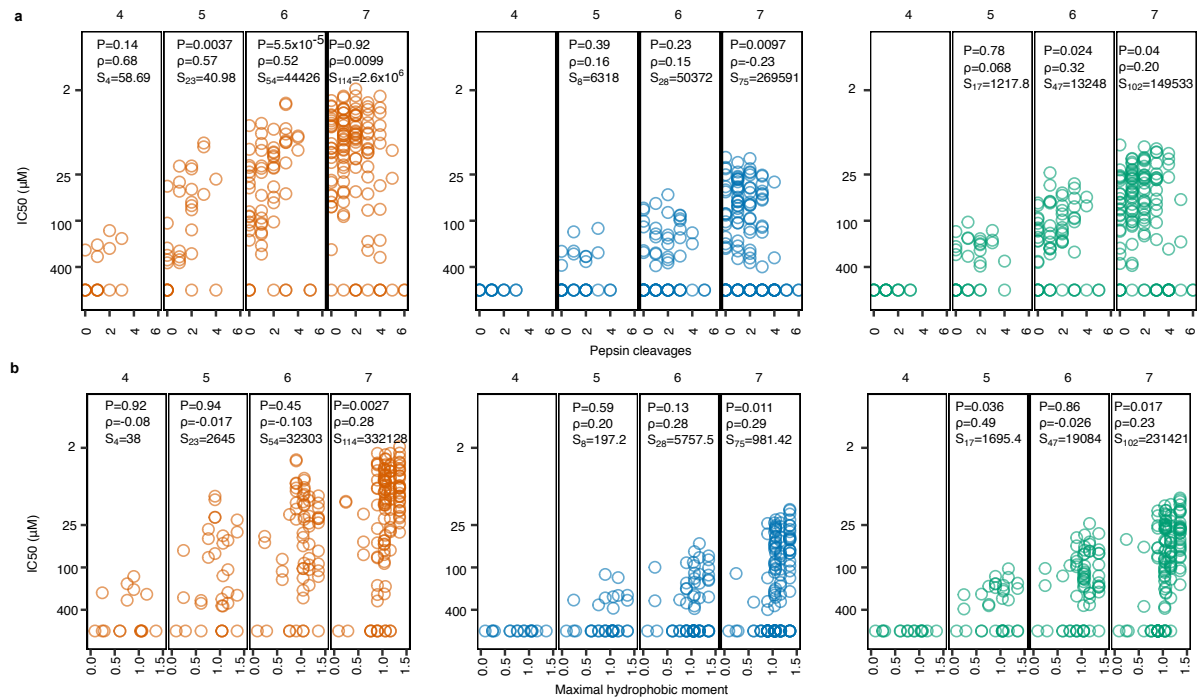

**Supplementary Fig. 3: *In silico* analysis of effect of number of pepsin cleavage sites or hydrophobic moment on antimicrobial activity.** (a) Inhibitory activity plotted against number of potential pepsin cleavage sites or against (b) hydrophobic moment, faceted by peptide length. Spearman's rank correlation coefficients were calculated for each faceted dataset for peptides which exhibited  $IC_{50}$  within the concentration range assayed (0.8 – 400  $\mu M$ ) and are shown in each panel.

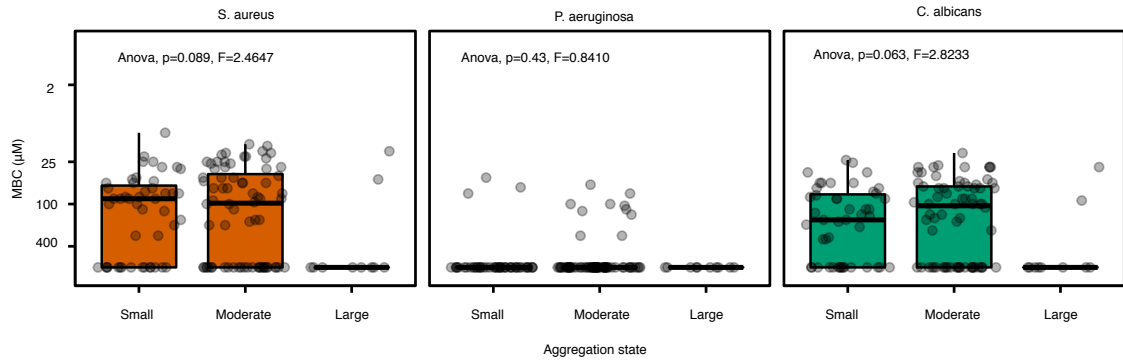

**Supplementary Fig. 4: Relationship between microbiocidal activity and peptide aggregation.** (a) Comparisons of microbiocidal activity and aggregation state for the three organisms assayed. Aggregation state was assessed in stock solutions (800  $\mu\text{M}$ ) using DLS, indicating the three size categories identified (featuring small, moderate or large aggregates). Error bars shown are  $\pm$  s.e.m. For further explanation see Fig. 3.

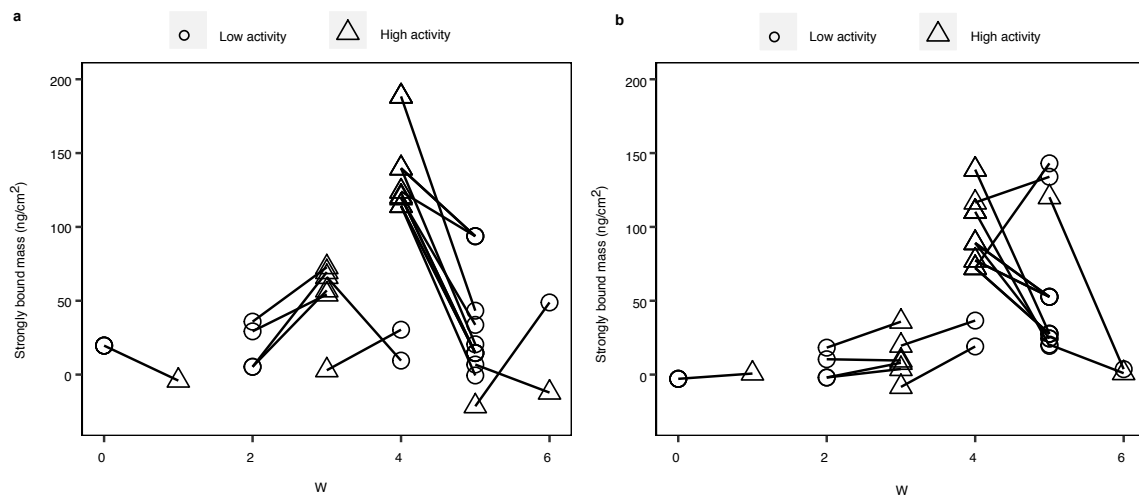

**Supplementary Fig. 5: Relationships between selected peptide pairs and membrane binding.** Mass of peptides bound to (a) anionic and (b) neutral membranes relative to the total number of W residues in each peptide. Peptide pairs in the selection are connected by lines, with the less active antimicrobial peptide indicated by a circle and the more active antimicrobial peptide by a triangle. For further explanation see Fig. 4.

**Supplementary Table 1: features selected by the Boruta algorithm as having a statistically significant relationship with each of the response indices.** For each index, the features have been ordered in descending level of mean importance. The number of features selected is shown, as well as the number of iterations required to reach a decision for all features.

|                          | IC <sub>50</sub> |                |                | MBC            |                |                | EC <sub>50</sub> | OD <sub>vis</sub> |
|--------------------------|------------------|----------------|----------------|----------------|----------------|----------------|------------------|-------------------|
|                          | S. aureus        | P. aeruginosa  | C. albicans    | S. aureus      | P. aeruginosa  | C. albicans    |                  |                   |
| mass                     | R%               | mass           | mass           | mass           | mass           | mass           | mass             | W                 |
| $\bar{X}_R$              | W%               | R%             | R%             | sequence       | W              | W              | W                | mass              |
| length                   | W                | W%             | length         | W              | W%             | WW             | WW               | R%                |
| W%                       | mass             | W              | W              | $\bar{X}_W$    | R%             | R%             | R%               | W%                |
| R%                       | R                | length         | R%             | W%             | $\sigma_W$     | W%             | W%               | length            |
| W                        | length           | X <sub>5</sub> | W%             | W              | R              | R              | R                | R                 |
| $\sigma_W$               | sequence         | $\sigma_W$     | $\sigma_W$     | R              | length         | WWRRWW         |                  |                   |
| X <sub>5</sub>           | $\sigma_R$       | R              | $\sigma_R$     | RRRW           | $\sigma_R$     | RWW            |                  |                   |
| X <sub>6</sub>           | $\bar{X}_R$      | $\sigma_R$     | WW             | WWRRRW         | sequence       | $\sigma_R$     |                  |                   |
| sequence                 | $\sigma_W$       | X <sub>6</sub> | R              | RRR            | WW             | length         |                  |                   |
| RWWWWW                   | X <sub>7</sub>   | WW             | WWR            | $\bar{X}_R$    | X <sub>6</sub> | X <sub>7</sub> |                  |                   |
| $\bar{X}_W$              | X <sub>5</sub>   | $\bar{X}_R$    | RRWW           | RWR            | WWRRRW         | RWWR           |                  |                   |
| WWWWW                    | X <sub>6</sub>   | sequence       | RWRWWW         | RRWR           | RWW            | X <sub>6</sub> |                  |                   |
| R                        | $\bar{X}_W$      | WWR            | RRWWW          | RRWWW          | WWR            | $\sigma_W$     |                  |                   |
| X <sub>4</sub>           | RRWW             | X <sub>7</sub> | RRWWR          | RRWWR          | $\bar{X}_R$    | WWR            |                  |                   |
| WR                       | WWR              | WRWWW          | RW             | RW             | $\bar{X}_W$    | RRW            |                  |                   |
| $\sigma_R$               | RWW              | $\bar{X}_W$    | RWW            | RWW            | X <sub>7</sub> | WWRWW          |                  |                   |
| WWWWWR                   | WW               | RRWWW          | $\bar{X}_W$    | WWW            | WWW            | sequence       |                  |                   |
| RW                       | RW               | RWW            | X <sub>5</sub> | WRRR           | WRRR           | RWWRW          |                  |                   |
| X <sub>7</sub>           | RRW              | WR             | WWRW           | RWWW           | RWWW           | WRRRW          |                  |                   |
| WRWWW                    | RWR              | WWWWW          | sequence       | X <sub>5</sub> | WWW            | WWW            |                  |                   |
| WWRW                     |                  | WRR            |                | RW             | RW             |                |                  |                   |
| WWR                      |                  | WRR            |                | WRR            | WRR            |                |                  |                   |
| WWW                      |                  | RRWWW          |                | WRR            | WRR            |                |                  |                   |
| WW                       |                  | X <sub>4</sub> |                | WRRW           | WRRW           |                |                  |                   |
| WWRWW                    |                  | RRWW           |                | RRWW           | RRWW           |                |                  |                   |
| WRRR                     |                  |                |                | RRW            | RRW            |                |                  |                   |
| RWW                      |                  |                |                | WRWW           | WRWW           |                |                  |                   |
| WRR                      |                  |                |                | RWWW           | RWWW           |                |                  |                   |
|                          |                  |                |                | WRRRR          | WRRRR          |                |                  |                   |
| <b>features selected</b> | 29               | 21             | 26             | 21             | 13             | 30             | 21               | 6                 |

**Supplementary Table 2: Table showing the feature space used to describe peptides.** Features have been split into different categories. The numbers of features in each category are shown, along with the total number of features in the space. In the symbol column A is amino acid and C is amino acid class.

| Symbol         | Feature category                            | Number of features |
|----------------|---------------------------------------------|--------------------|
| A%             | Percentage abundance of amino acid          | 2                  |
| $\bar{X}_A$    | Mean position of amino acid                 | 2                  |
| $\sigma_A$     | Positional standard deviation of amino acid | 2                  |
| AA             | Duplets                                     | 4                  |
| AAA            | Triplets                                    | 8                  |
| X <sub>7</sub> | Sequence position                           | 7                  |
|                | Longer sub-sequences                        | 240                |
|                | Other features (length, mass)               | 2                  |
|                | <b>Total number of features</b>             | <b>267</b>         |
