# Supplementary material for: The lexicon of antimicrobial peptides: a complete set of arginine and tryptophan sequences
Source: PubMed Central journal article supplement (PMC8140080; doi:10.1038/s42003-021-02137-7), 2021-05-21
Supplement: 42003_2021_2137_MOESM3_ESM.pdf [file 42003_2021_2137_MOESM3_ESM.pdf]

## Description of Additional Supplementary Files

File Name: Supplementary Movie 1

Description: **Antimicrobial activity network.** Peptides are nodes in the network and peptides separated by a single edit (single residue insertion, deletion or base change) are connected by an edge. Nodes are represented by red spheres, whose radius is proportional to the antimicrobial activity against *S. aureus* ( $1/IC_{50}$ ).
